# Supplementary material for: Solvent-controlled synthesis of hydrophilic and hydrophobic carbon dots
Source: Royal Society of Chemistry journal article supplement (doi:10.1039/d3cp04273a), 2023-12-08
Supplement: d3cp04273a1.pdf [file d3cp04273a1.pdf]

## **Supporting Information**

# **Solvent-Controlled Synthesis of Hydrophilic and Hydrophobic Carbon Dots**

Chenhan Zhang,<sup>a</sup> Zihua Ying,<sup>\*a</sup> Yuan Jiang,<sup>\*a</sup> Haiyang Wang,<sup>a</sup> Xuebin Zhou,<sup>a</sup> Weipeng Xuan<sup>a</sup> and  
Peng Zheng<sup>a</sup>

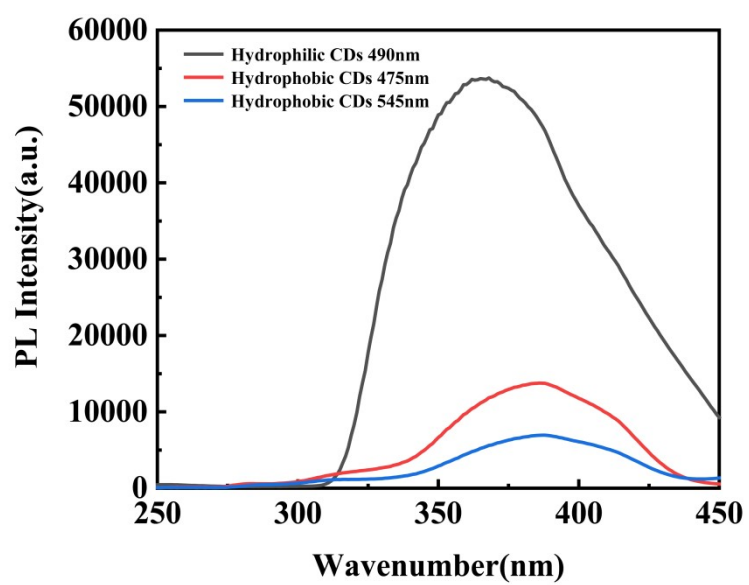

Fig. S1. The PL excitation (PLE) spectra of the hydrophobic and hydrophilic CDs.

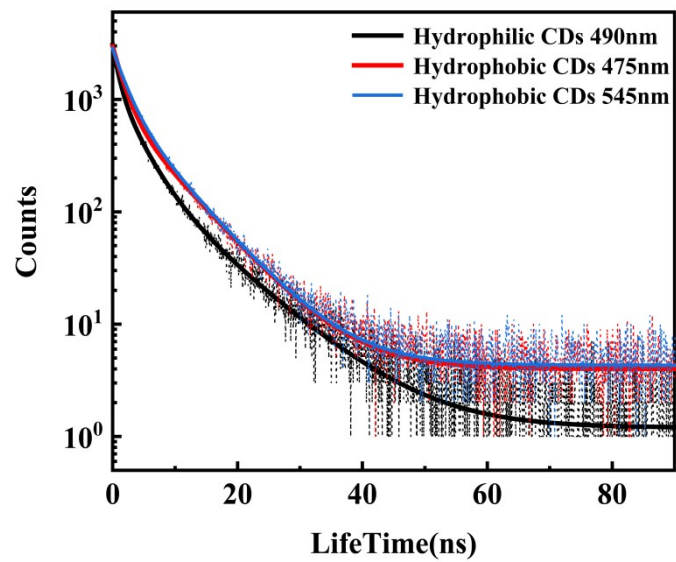

Fig. S2. The PL decay curves of hydrophobic and hydrophilic CDs at different emission wavelengths.

Table S1. The lifetime of hydrophobic and hydrophilic CDs at different emission wavelengths.

|                              | $\tau_1$ (ns)    | $f_1$ (%)        | $\tau_2$ (ns)    | $f_2$ (%)        | $\tau_3$ (ns)    | $f_3$ (%)        | $\tau_{avg}$ (ns) |
|------------------------------|------------------|------------------|------------------|------------------|------------------|------------------|-------------------|
| <b>Hydrophilic CDs 490nm</b> | $0.907 \pm 0.04$ | $20.68 \pm 0.34$ | $3.179 \pm 0.13$ | $47.05 \pm 0.08$ | $9.160 \pm 0.21$ | $32.27 \pm 0.29$ | $4.6 \pm 0.15$    |
| <b>Hydrophobic CDs 475nm</b> | $1.702 \pm 0.03$ | $38.58 \pm 0.04$ | $7.07 \pm 0.07$  | $61.42 \pm 0.12$ |                  |                  | $5.0 \pm 0.06$    |
| <b>Hydrophobic CDs 545nm</b> | $2.083 \pm 0.04$ | $39.63 \pm 0.21$ | $6.979 \pm 0.08$ | $60.37 \pm 0.23$ |                  |                  | $5.0 \pm 0.07$    |

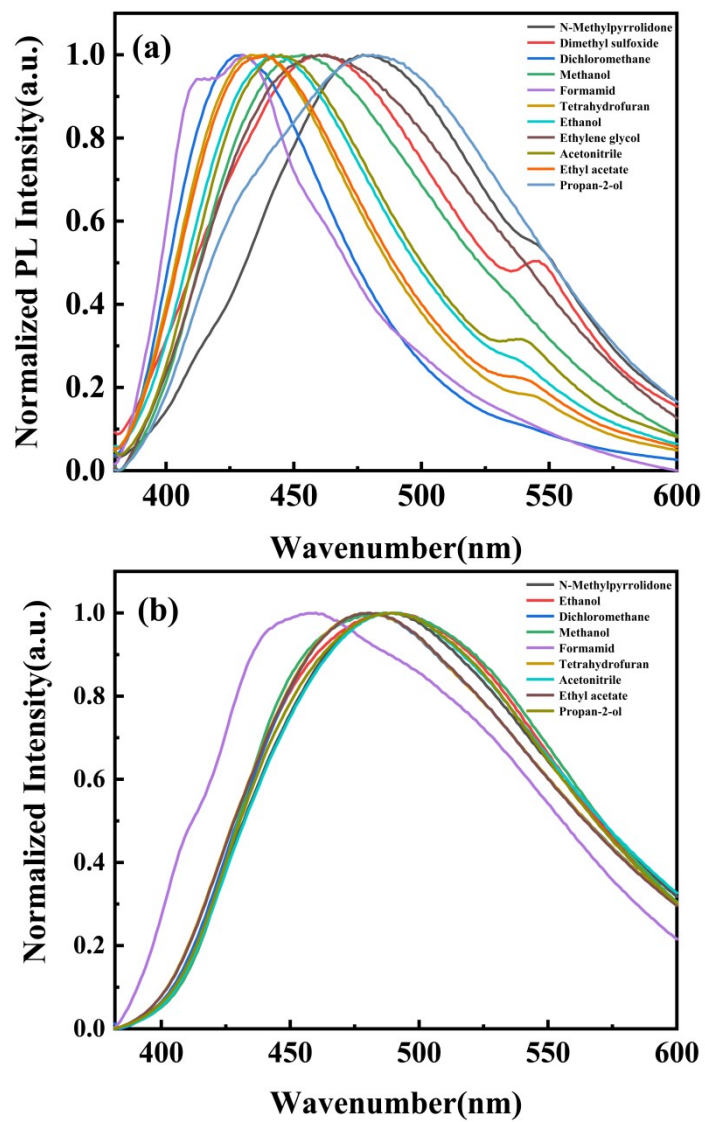

Fig. S3. Normalized PL spectra of (a) hydrophobic CDs and (b) hydrophilic CDs, in different solvents.

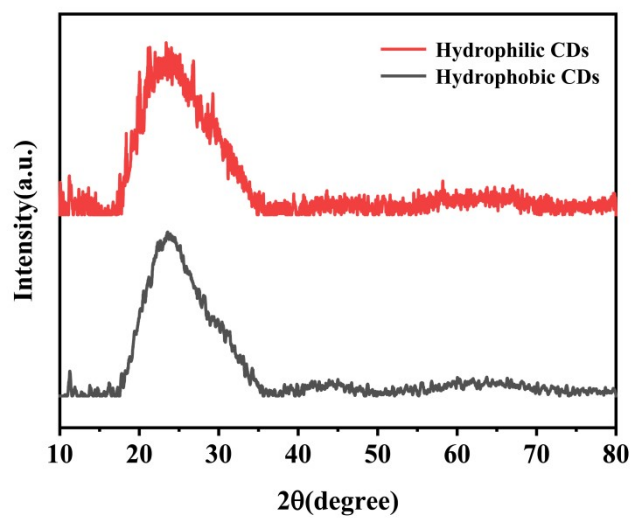

Fig. S4. XRD patterns of the hydrophilic CDs and hydrophobic CDs.

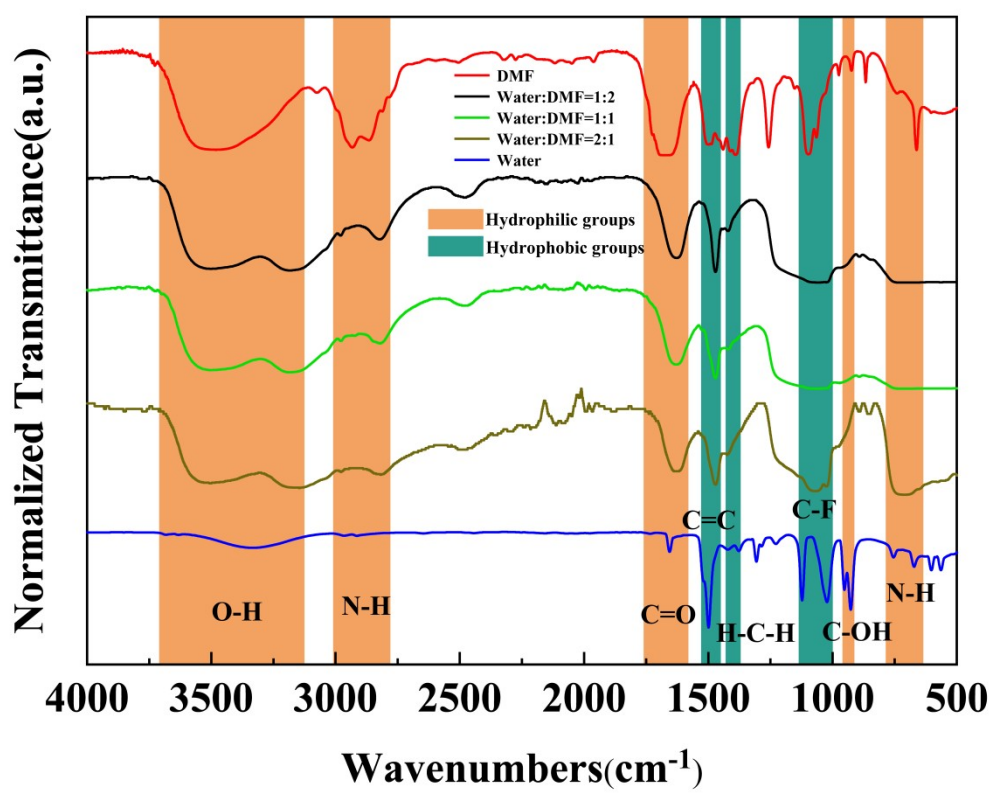

Fig. S5. FT-IR spectra of all prepared CDs normalized at C=C.
